# Supplementary material for: An oral keratinocyte life cycle model identifies novel host genome regulation by human papillomavirus 16 relevant to HPV positive head and neck cancer
Source: PubMed Central journal article supplement (PMC5669857; doi:10.18632/oncotarget.18328), 2017-06-01
Supplement: oncotarget-08-81892-s001.pdf [file oncotarget-08-81892-s001.pdf]

# An oral keratinocyte life cycle model identifies novel host genome regulation by human papillomavirus 16 relevant to HPV positive head and neck cancer

## Supplementary Material

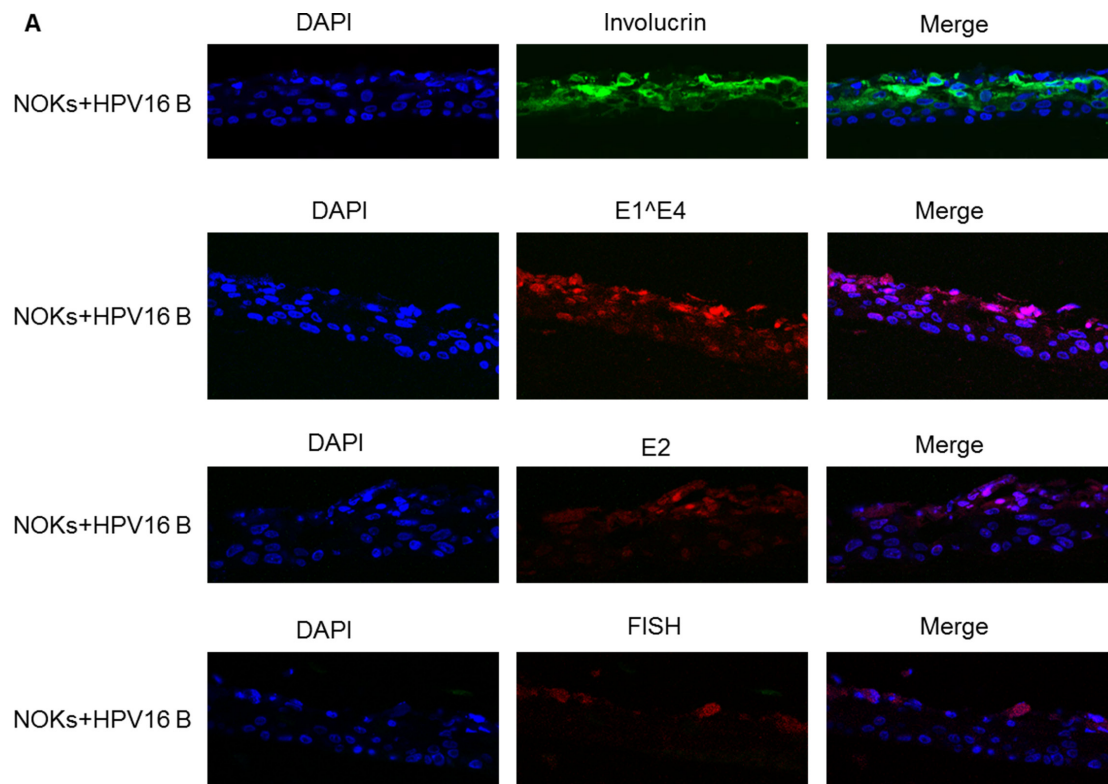

Supplementary Material: The HPV16 life cycle in NOKs+HPV16 B

For Supplementary Tables see in Supplementary Files
